## RESEARCH ARTICLE

## Effects of land-use change and related pressures on alien and native subsets of island communities

Katia Sánchez-Ortiz<sup>1,2\*</sup>, Kara J. M. Taylor<sup>3</sup>, Adriana De Palma<sup>1</sup>, Franz Essl<sup>4</sup>, Wayne Dawson<sup>5</sup>, Holger Kreft<sup>6,7</sup>, Jan Pergl<sup>8</sup>, Petr Pyšek<sup>9,9</sup>, Mark van Kleunen<sup>10,11</sup>, Patrick Weigelt<sup>6</sup>, Andy Purvis<sup>1,2</sup>

**1** Department of Life Sciences, Natural History Museum, London, United Kingdom, **2** Department of Life Sciences, Imperial College London, London, United Kingdoms, **3** Food Animal Health Research Program, Ohio Agricultural Research and Development Center, The Ohio State University, Wooster, Ohio, United States of America, **4** BioInvasions, Global Change, Macroecology-Group, Department of Botany and Biodiversity Research, University Vienna, Vienna, Austria, **5** Department of Biosciences, Durham University, Durham, United Kingdom, **6** Biodiversity, Macroecology & Biogeography, University of Goettingen, Göttingen, Germany, **7** Centre of Biodiversity and Sustainable Land Use, University of Goettingen, Göttingen, Germany, **8** Department of Invasion Ecology, Institute of Botany, The Czech Academy of Sciences, Průhonice, Czech Republic, **9** Faculty of Science, Charles Department of Ecology, University, Prague, Czech Republic, **10** Ecology, Department of Biology, University of Konstanz, Konstanz, Germany, **11** Zhejiang Provincial Key Laboratory of Plant Evolutionary Ecology and Conservation, Taizhou University, Taizhou, China

\* [k.sanchez-ortiz@nhm.ac.uk](mailto:k.sanchez-ortiz@nhm.ac.uk)

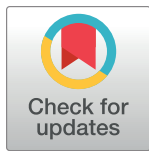

## OPEN ACCESS

**Citation:** Sánchez-Ortiz K, Taylor KJM, De Palma A, Essl F, Dawson W, Kreft H, et al. (2020) Effects of land-use change and related pressures on alien and native subsets of island communities. PLoS ONE 15(12): e0227169. <https://doi.org/10.1371/journal.pone.0227169>

**Editor:** Jana Müllerová, Institute of Botany of the Czech Academy of Sciences, CZECH REPUBLIC

**Received:** December 12, 2019

**Accepted:** November 16, 2020

**Published:** December 3, 2020

**Copyright:** © 2020 Sánchez-Ortiz et al. This is an open access article distributed under the terms of the [Creative Commons Attribution License](https://creativecommons.org/licenses/by/4.0/), which permits unrestricted use, distribution, and reproduction in any medium, provided the original author and source are credited.

**Data Availability Statement:** All data are available from the figshare repository at <https://doi.org/10.6084/m9.figshare.13266638.v1>.

**Funding:** The project received support from NERC (grant NE/M014533/1) and the Prince Albert II of Monaco Foundation ("Plants Under Pressure 2"). Author KSO was funded by the National Council of Science and Technology (CONACyT – Mexico). FE appreciates funding by the Austrian Science Foundation FWF (grants I2086-B16 and I 4011-B32). Authors PP and JP were supported by

## Abstract

Island species and habitats are particularly vulnerable to human disturbances, and anthropogenic changes are increasingly overwriting natural island biogeographic patterns. However, quantitative comparisons of how native and alien assemblages respond to human disturbances are scarce. Using data from 6,242 species of vertebrates, invertebrates and plants, from 7,718 sites on 81 islands, we model how land-use change, human population density and distance to the nearest road affect local assemblages of alien and native species on islands. We found that land-use change reduces both richness and abundance of native species, whereas the number and abundance of alien species are high in plantation forests and agricultural or urban sites. In contrast to the long-established pattern for native species (i.e., decline in species number with island isolation), more isolated islands have more alien species across most land uses than do less isolated islands. We show that alien species play a major role in the turnover of island assemblages: our models show that aliens outnumber natives among the species present at disturbed sites but absent from minimally-disturbed primary vegetation. Finally, we found a homogenization pattern for both native and alien assemblages across sites within most land uses. The declines of native species on islands in the face of human pressures, and the particular proneness to invasions of the more remote islands, highlight the need to reduce the intensity of human pressures on islands and to prevent the introduction and establishment of alien species.

EXPRO grant no. 19-28807X (Czech Science Foundation) and long-term research development project RVO 67985939 (Czech Academy of Sciences). The funders had no role in study design, data collection and analysis, decision to publish, or preparation of the manuscript.

**Competing interests:** The authors have declared that no competing interests exist.

## Introduction

Land use and related anthropogenic pressures—such as habitat destruction, use intensity and human population growth—strongly modify species diversity within local ecological assemblages [1–3] and turnover between them [4], in ways that can differ significantly between ecological systems or geographic regions [1,5,6]. Islands—landmasses completely surrounded by ocean and smaller than continents—represent a set of ecosystems and regions where the effects of these pressures may be particularly severe, for two reasons. First, many species native to islands have characteristics—e.g., narrow-range endemism, small population size—that make them both irreplaceable and particularly vulnerable to human disturbances [7–9]. Second, islands have been highlighted as hotspots of alien species [10–13] and as systems at higher risk of invasions [14–17].

Natural and anthropogenic factors may combine to make islands, and their site-level communities, prone to invasion. Islands—especially remote ones—have a relatively small pool of native species [18] from which their communities are assembled. The resulting low species richness for their area [19] is in turn hypothesised to result in more available resources [15], low pressures from predators or pathogens, and disharmonic communities (i.e. with a biased representation of certain taxonomic or functional groups) [16,20]. Additionally, many native species have low competitive ability [16] and have evolved reduced dispersal abilities [20] and reproductive output [21–23]. These natural factors combine to facilitate establishment by alien colonists, especially in disturbed sites [24–26]. Land-use change involves site-level disturbance, favouring the establishment of alien species (often good dispersers that reproduce rapidly and tolerate a broad range of conditions [27–29]). Additionally, humans have directly introduced many alien species to islands, with propagule pressure (i.e., number of released individuals [30]) and the presence of other groups of introduced species [31] both influencing the probability of establishment.

Anthropogenic disturbances favour alien species, but disturbed habitats can represent novel environments for some native species, to which they may not be sufficiently well adapted to exploit [15]. Natives with traits related to a high extinction risk—such as large size [32,33], low fecundity, limited dispersal abilities, high habitat specificity [34] and small range-size [33,35]—are particularly unlikely to tolerate human impacts, whereas those with the opposite traits are likely to be more resilient. Both the addition of aliens and the accelerated turnover of natives can drive changes in among-site species turnover, including biotic homogenization [36]: their relative importance remains an open question. Quantitative comparisons of how native and alien species respond to human disturbances on islands are still scarce (but see [24,25,37,38]).

If alien species follow natural island biogeographic patterns, large islands and islands close to other land masses would have more alien species than small and isolated ones [39]. However, evidence is mounting that anthropogenic processes have already altered fundamental biogeographical patterns such as the species–isolation relationship [12,40–42]. Anthropogenic factors such as colonisation pressure (i.e., number of species introduced to a defined location [11,43]) or economic isolation of islands [41] may have become more important for the assembly and diversity of insular biota than geographic isolation. Measures of economic activity are related to colonisation [44] and propagule pressures (e.g., trade volumes), ecological disturbances [45] and infrastructure development [46] (e.g., roads), all of which ease the arrival and establishment of alien species [45,46]. Here, as a simple proxy for islands' economic connectivity, we use per-capita Gross Domestic Product (GDP), which has previously been shown to correlate across countries globally with the numbers of alien introductions [11] and, among

countries within regions, with numbers of established alien plants [47], amphibian and reptile species [10].

In this paper, we use data from 6,242 species (including vertebrates, invertebrates and plants), from 7,718 sites on 81 islands in the PREDICTS database [48], whose native/alien status could be determined, to model how land-use change and related pressures affect local native and alien assemblages on islands. This study is the first global analysis of its kind to include a wide range of taxa while focusing specifically on islands. Based on models of site-level total abundance and species richness, we show that three human pressures (land use, human population density and distance to the nearest road) affect alien assemblages differently from native assemblages. Additionally, we test whether richness and abundance of alien species is predicted by measures of island size, geographic isolation and economic connectance. To evaluate the turnover of native and alien assemblages caused by land-use change on islands, we estimate how species composition of alien and native communities in minimally-disturbed sites is affected by land-use change. Finally, for native and alien assemblages separately, we estimate the homogeneity of assemblages among sites within the same land use.

## Methods

### Biodiversity data and species status

All data on species abundance and occurrence at sites on islands (including Australia) were extracted from the PREDICTS database [48] in October 2016. The database collates data from published research that compared local biodiversity across sites in different land uses, and is structured hierarchically into Data Sources (publications), Studies (different sampling methods within a source), Blocks (spatial blocks, if present in the study) and Sites [49]. Australia was treated as an island because of its island-like characteristics—e.g., long isolation history (complete isolation from other continents ~ 33 Mya [50]) and markedly smaller size than other continents. The name of the island where each site was located was determined by matching the site coordinates with the Global Island Database, ver. 2.1 [51]. All data processing and statistical analyses were performed using R Version 3.3.3 [52], unless otherwise stated.

The island data from PREDICTS included 17,776 species and 1,339,339 biodiversity records (each being a single abundance measure or occurrence record of a species at a site within a study). Only 42 of the 168 data sources had already classified the sampled species as aliens or natives at the sites sampled. To classify as many remaining species as possible, we matched PREDICTS records with 27 external sources of information on native and alien ranges (Table 1 in [S1 File](#)). Three global databases provide island-specific (rather than country-level) species classifications: the Global Naturalized Alien Flora database (GloNAF; [53,54]), the Global Inventory of Floras and Traits (GIFT; [55]) and the Threatened Island Biodiversity database (TIB; [56]). We identified all matching species-island combinations between these three databases and the PREDICTS island data. For remaining taxa, we queried additional databases (Table 1 in [S1 File](#)) as well as GloNAF for species status at a country level, via either downloadable datasets or an Application Programming Interface (API). Most of these external sources provided a direct indication of the species status in different locations (e.g. alien, invasive, naturalized, native, endemic). When databases provided geographic ranges for species, we first extracted the status for the matching species-country combinations, but also classified species according to the geographic ranges provided by these sources: i.e., species whose sampling location in our dataset was not included in their native range were classified as alien. In a final step, we searched for data sources that could help classify species with many records in our data set that had remained unclassified to this point (mainly arthropods); these additional

sources included taxonomic experts from different institutions, publications and databases for specific taxa and countries.

## Statistical modelling

**Models of total abundance and species richness.** For each site, we split the PREDICTS data into native species and alien species, discarding data that could not be classified. For aliens and natives separately, we calculated each site's total abundance (sum of abundances of all taxa present) and species richness (number of unique taxa present). When sampling effort (provided in source publications) varied among sites within a study, total abundance was divided by the sampling effort to make data comparable among the study's sites; this was the case for 24 of 163 studies. Not all the studies reported abundance data, meaning that models of abundance were based on 18 fewer studies. Dropping these 18 studies from the richness dataset (to use the same data in both models) did not markedly change our results; therefore, we present the results from the model using all available data for species richness.

There were 74 studies that reported data only for natives (66 studies) or aliens (8 studies). Referring back to the published methodologies for each such study, thirteen studies had explicitly targeted only native species and two only aliens; most of these only focused on sampling a few (between one and eight) species instead of native or alien communities *per se*. For sites within these studies, we treated the site-level diversity of the unsampled class as missing. The remaining studies had targeted the entire assemblage but the recorded species whose status could be determined were either all natives (53 studies) or all aliens (6 studies). For sites within these studies, we assigned zero site-level diversity metrics (for metrics originally available in the study) for the missing group in the study (aliens or natives). To account for the fact that not all species in the studies could be classified as aliens or natives, we weighted sites in the analyses that follow, with each site's weight being its proportion of classified species (i.e., adding weight to sites which kept data for most of their originally sampled species).

The studies in the PREDICTS database differ greatly in their sampling methods, taxonomic focus and locations (Tables 4 and 5 and Fig 1 in [S1 File](#)); and some studies have spatial blocks or split-plot designs. To accommodate the resulting heterogeneity and non-independence, we fitted mixed-effect models (using the 'lme4' package ver. 1.1–15 –[57]) to model the responses of alien and native species richness and total abundance to human pressures. As fixed effects, the full models included two three-way interactions between two human pressures at a site-level and the species status (alien/native): one between land use, human population density (HPD) and species status; and the second between land use, distance to nearest road (DistRd) and the species status. Because not all abundance data were counts of individuals (e.g., relative abundance), Poisson or quasipoisson models could not be used: instead, sites' total abundance was rescaled to a zero-to-one scale within each study (dividing by the maximum abundance within the study) to reduce the variance among studies, then square-root transformed (which gave a better residual distribution than  $\ln(x+1)$  transformation), and modelled using a Gaussian error structure. Species richness (always a count) was modelled using a Poisson error structure and log-link function.

Site-level data for human population density (for the year 2000) were taken from the Global Rural-Urban Mapping Project, ver. 1 (GRUMPv1) [58] at a resolution of 30 arc sec (~1 km). Site distance to the nearest road came from the Global Roads Open Access Data Set, ver. 1 (gROADSv1) [59]; we projected this vector map of the world's roads onto an equal-area (Behrmann) projection and calculated the average distance to the nearest road within each 782-m grid cell using the 'Euclidean Distance' function, from which we produced a gridded map of distance to nearest road (using Python code written for the *arcpy* module of ArcMap ver.

10.3), which we reprojected back to a WGS 1984 projection at 30 arc sec resolution. HPD and DistRd for each site was obtained by matching the sites' coordinates with these gridded maps. We treated HPD and DistRd as constant within grid cells. HPD and DistRd were  $\ln$  transformed ( $\ln(x+1)$  in the case of HPD) to reduce skew and rescaled to a zero-to-one scale (to reduce collinearity) prior to modelling, and fitted as quadratic orthogonal polynomials.

Sites in the PREDICTS database had previously been classified into 10 land-use categories and three land-use intensities (minimal, light and intense) within each land use [49]. For our models, these categories were collapsed into seven final land-use/use-intensity classes: 1) Minimally-used primary vegetation (henceforth PriMin; used as a baseline representing minimally disturbed sites), 2) Primary vegetation (other than minimal use), 3) Secondary vegetation, 4) Plantation forest, 5) Cropland, 6) Pasture and 7) Urban. These collapsed classes gave reasonable sample sizes (at least 300 sites) within each land-use class for both alien and native data (Table 7 in [S1 File](#)). Sites missing data for any of the human pressures were excluded from these models.

As random effects for the models, we initially considered random-intercept terms of identity of the study from which data came from (to account for the variability in sampled biodiversity, sampling methods and location across studies), identity of the spatial block—nested within study—in which the site was located (to account for the spatial arrangement of sites) and island (to account for the variability of sampled biodiversity across islands). We also considered random slopes to account for the variation among studies in the relationships between sampled biodiversity and land use/use intensity. To identify the best random-effects structure, we compared four possibilities following the procedure in [60]: (i) random slopes for land uses within study + random intercepts of study, block nested within study and island, (ii) same structure as (i) but dropping the island random intercept, (iii) random intercepts of study, block nested within study and island, and (iv) random intercepts of study and block nested within study. For the richness model, we added an observation-level random effect (i.e. site identity), to account for overdispersion [61]. Once the random-effects structure had been chosen, the fixed-effects structure of the final models was determined using backwards stepwise model simplification and likelihood ratio tests with models fitted using maximum likelihood [60]. Generalized Variance Inflation Factors (GVIFs) [60] did not indicate strong collinearity among the explanatory variables and model diagnostics showed that the final abundance and richness models fulfilled homogeneity and normality assumptions (Fig 2 in [S1 File](#)).

**Models including island characteristics as predictors.** We tested whether any of three island characteristics—area, isolation and GDP per capita—predicted total abundance and richness of aliens. Island area (in  $\text{km}^2$ ) was calculated using a global layer of land polygons taken from OpenStreetMap [62] in cylindrical equal area projection. As a proxy for island isolation, we used Weigelt et al.'s [63] values for the sum of the proportions of landmass within buffer distances of 100, 1,000 and 10,000 km around the island (henceforth, surrounding landmass), which has been shown to predict diversity of plants on islands at a global scale [64]. Data for three Japanese islands and Australia (Table 11 in [S1 File](#)) were missing from Weigelt et al. [63], so these four islands were not included in the surrounding landmass models. GDP per capita (in current US dollars for the year 2005) for each site's country came from World Bank Open Data.

Using only the alien data, we fitted six mixed-effects models—testing each of the three island characteristics in turn as predictors of richness and abundance—with the same modelling approach as used above with the following exceptions. We dropped studies that had zero site-level diversity metrics for aliens across all sites, which resulted from adding these metrics to some studies missing alien data. As fixed effects, each initial model included one two-way interaction between land use and the island characteristic. To reduce skewness and improve



the distribution of residuals [65], island area and GDP per capita were ln-transformed. Surrounding landmass did not require transformation. We considered two possible random-effects structures for the models: (i) random intercepts of study (ii) random intercepts of study and island. The richness models were not overdispersed. Based on GVIFs, we did not find strong collinearity among the explanatory variables of any of the models. We performed post hoc analysis (package 'phia' ver. 0.2-1 [66]) to test whether the coefficients of the interaction between the land uses and the island trait were significantly non-zero.

**Models of compositional similarity.** To model how land-use change affects the turnover of native and alien assemblages on islands, we model pairwise differences in assemblage composition among sites using a modified matrix regression, explained in more detail below. Under this approach, the non-independence among the pairwise comparisons necessitates the use of permutation tests to assess statistical significance [67].

We first calculated compositional similarity (for aliens and natives separately) for all possible pairwise comparisons between sites (including both forward and reverse comparisons) within each study using the abundance-based ( $J_A$ ) and richness-based ( $J_R$ ) asymmetric Jaccard Index, calculated as:  $J_R = S_{ij} / S_j$ , where  $S_{ij}$  is the number of species common to both sites and  $S_j$  is the number of species in site  $j$ ;  $J_A = A_{ij} / A_j$ , where  $A_{ij}$  is the summed abundance at site  $j$  of all species common to both sites and  $A_j$  is the summed abundance of all species at site  $j$  [68]. These asymmetric measures reflect the possibility of one site's assemblage being largely nested within another [69]. Both measures are one if all taxa at site  $j$  are also present at site  $i$ , zero if the two sites share no taxa in common, and undefined (and dropped from analyses) if neither site had any organisms sampled. Low  $J_A$  and  $J_R$  values mainly result from a high number or high abundance of novel or unique species in site  $j$  (i.e., species recorded at site  $j$  but missing in site  $i$ ).

We fitted mixed-effects models to model both  $J_A$  and  $J_R$  as a function of the sites' land uses (henceforth land-use contrast; e.g. PriMin-Pasture), the geographic and environmental distance between the sites (to account for similarity decay with geographic [70] and environmental distance) and the assemblage status (native or alien). Land-use contrast was a 49-level factor (i.e., all possible combinations for the seven land-use categories); however, we only focus on results for 13 land-use contrasts (Table 16 in S1 File):—the set of contrasts with site  $i$  in PriMin, estimating how the composition of native and alien species of minimally-disturbed sites is affected by change to each other land use; and the set of contrasts with both sites in the same land use, estimating how similar communities are among sites facing similar pressures. For both alien and native data, the land-use contrasts of interest had sample sizes >1900 and included data from five or more studies (Table 16 in S1 File); the only exception was PriMin-Urban, for which data only came from one study for aliens and two studies for natives. Because estimates based on so few studies are unreliable [71], we do not report the results for this contrast (model coefficients for all land-use contrasts are presented in Table 17 in S1 File). Geographic distance between sites was calculated from the sites' coordinates using the 'distHaversine' function in the 'geosphere' package ver. 1.5-7 [72]. Environmental distance was estimated as the dissimilarity between sites, measured as the Gower's distance [73] between them calculated from site-level data for altitude and four bioclimatic variables (maximum and minimum temperature and precipitation of wettest and driest month) at 1-km spatial resolution [74]. We excluded pairwise comparisons for which environmental distance could not be calculated due to missing data or where geographic distance was zero as a result of coordinate imprecision. We also excluded studies that sampled a single species, where sampling effort varied among sites and that did not report abundance data so that our abundance- and richness-based models would use data from the same studies.

As fixed effects, the models included two-way interactions between assemblage status (alien/native) and each of geographic distance, environmental distance and land-use contrast. Study identity was included as a random intercept. The models were fitted adding weight to pairwise comparisons with a higher proportion of classified species in site  $j$ . We used the PriMin-PriMin contrast as the intercept level in the models and a baseline against which to compare the other land-use contrasts, since it represents the natural spatial turnover of species. Prior to modelling, compositional similarity was logit-transformed (using an adjustment of 0.01 to deal with 0 and 1 values [75]). To deal with extreme values [65] and normalise the data distribution, environmental distance was transformed using cube root, and geographic distance was first divided by the median maximum linear extent (maximum distance between sampling points within a site; e.g., extent of a single quadrat or the greatest distance between any two traps within a site) of the sites in the dataset (which reflects site size [76]) and then ln-transformed; as a result, a transformed geographic distance of zero corresponds to adjacent sites. GVIFs did not indicate strong collinearity among the explanatory variables of the models for  $J_A$  and  $J_R$ , which also fulfilled homogeneity and normality assumptions (Fig 13 in S1 File).

Because these models use all pairwise comparisons, they have extensive pseudo-replication, precluding the use of standard statistical approaches to simplify the fixed effects of the models. We therefore used permutation tests [67] to assess significance of terms during backwards step-wise model simplification based on likelihood ratios. The model dataset was permuted 199 times by randomly shuffling the response variable data among sites within studies while holding data for all explanatory variables constant. The likelihood ratio between models at successive stages of model simplification (i.e., between a more complex and a less complex model) was compared against a null distribution of ratios of initial and reduced models fitted with the 199 permuted datasets (function '*as.randtest*' in the '*ade4*' package ver. 1.7-10 –[77]). The statistical significance of the model coefficients for interactions between alien/native status and the other explanatory variables was tested in the same way, except that the comparisons between the model coefficients and the coefficients obtained from the permutation trials were two-tailed.

## Results

3,059 species recorded from 2,840 island sites in the PREDICTS database were already classified as native or aliens by 42 data sources. There were 13,108 unique combinations of island and species with a Latin binomial, of which 1,109 (for 1,039 species) could be classified using the island-specific databases, and 10,968 unique combinations of species and country, of which 2,160 (for 1,866 species) could be classified using the country-level external sources. The resulting data included 794 alien species and 5,517 native species (Table 6 in S1 File). In total, we were able to classify ~52% of the island biodiversity records in the PREDICTS database as native or alien (Table 4 in S1 File), and retained ~70% of the island studies and ~75% of island sites in the PREDICTS database. The final site-level diversity dataset included data for alien species from 7,474 sites in 150 studies, 54 islands and 27 countries, and data for native species from 7,524 sites, in 161 studies, 81 islands and 28 countries (location of sites is shown in Fig 1 in S1 File). The datasets used in modelling are described further in Tables 7, 11 and 16 in the S1 File and are available at <https://doi.org/10.6084/m9.figshare.13266638.v1>.

### Effects of human pressures on native and alien species

The best random-effects structure for the abundance and richness models included random slopes for land uses within study and random intercepts of study, block nested within study and island (Table 8 in S1 File); however, failure of richness models with this structure to converge forced us to model richness without the island random intercept. We chose to also

model abundance without this random intercept to keep the same random-effects structure in both models (after confirming that results from abundance models with and without the island random intercept differed minimally). Aliens and natives responded very differently to human pressures, in terms of both overall abundance (Table 9 in [S1 File](#)) and species richness (Table 10 in [S1 File](#)).

On average, ~17% of the species and individuals in sites in minimally-disturbed primary vegetation (in the species-richness and abundance datasets, respectively) were aliens (and ~83% natives) (Figs 7 and 8 in [S1 File](#)). Compared with PriMin, four land uses had significantly lower overall abundance of natives: pastures (-32%), plantation forests (-30%), croplands (-21%) and secondary vegetation (-12%) (Fig 1). By contrast, aliens were very much more abundant in all other land uses, especially in the human-dominated land uses, than in primary vegetation (Fig 1). Plantation forests and agricultural land uses (croplands and pastures) had markedly lower native species-richness, but much higher alien species-richness (plantation forests and pastures for the latter case), than seen in PriMin sites (Fig 2).

The covariates in these models—HPD and DistRd—interact significantly with land use to shape both abundance (Table 9 in [S1 File](#)) and species richness (Table 10 in [S1 File](#)) in ways that differ between natives and aliens, but effects are not even qualitatively consistent among land uses or between aliens and natives (Figs 3 to 6 in [S1 File](#)).

### Island characteristics as predictors of alien abundance and richness

For all six models relating alien abundance or species richness to island characteristics, the best random-effects structure included random intercepts of study and island (Tables 12 and

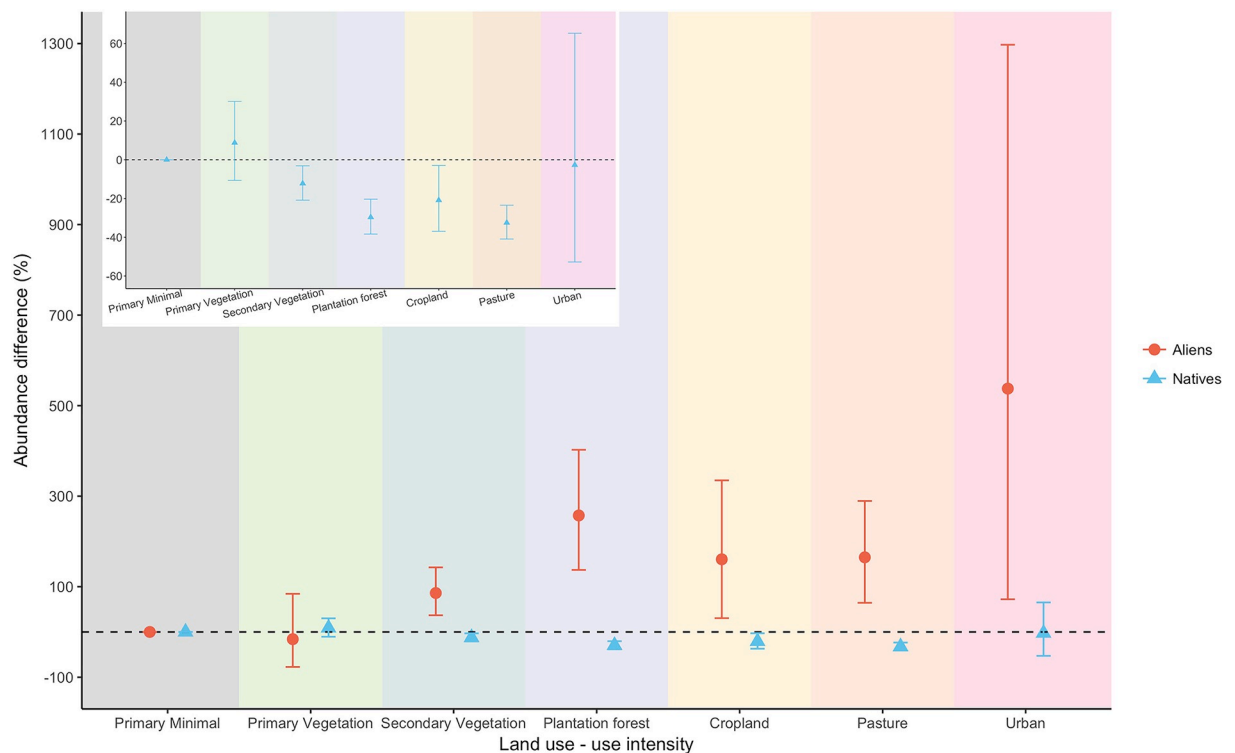

**Fig 1. Response of total abundance of aliens and natives to land use.** Values indicate decrease or increase in percentage of total abundance using minimally-used primary vegetation as baseline (dashed line). Bars indicate 95% confidence intervals, which are asymmetric because of back-transformation from the square-root scale. The inset expands the y-axis for natives, which are not clearly visible in the main plot.

<https://doi.org/10.1371/journal.pone.0227169.g001>



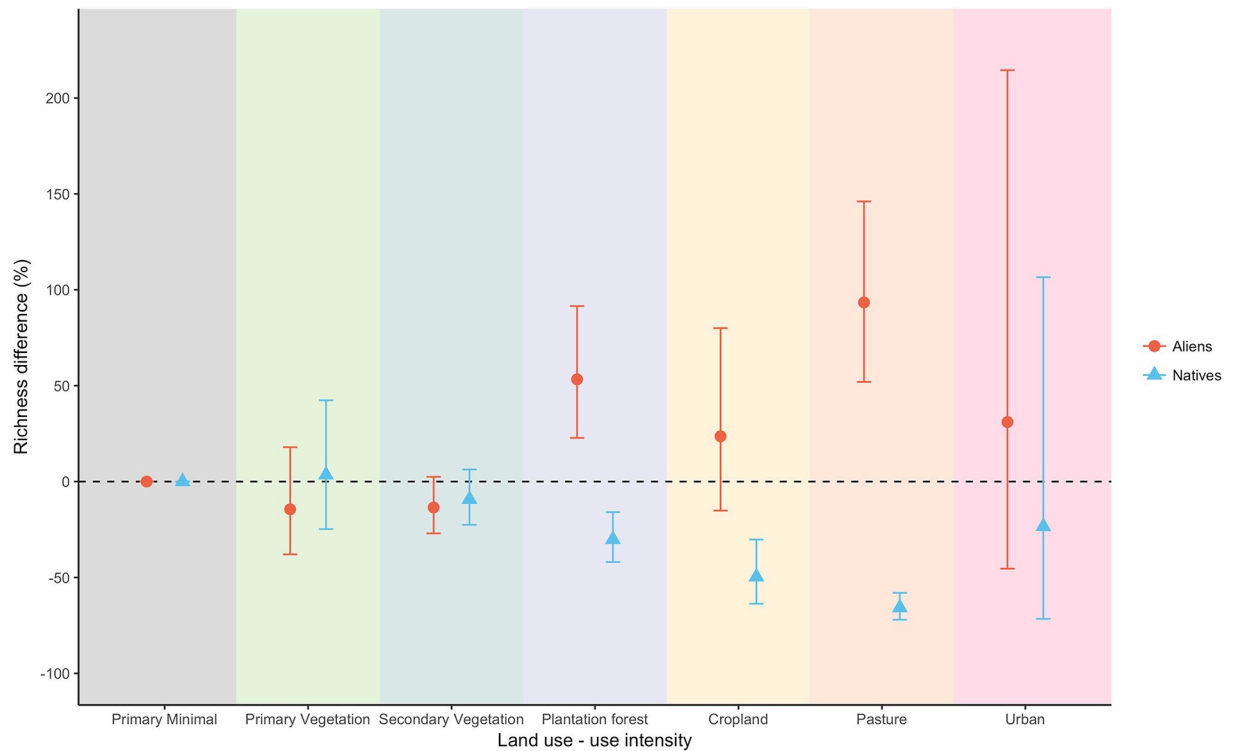

**Fig 2. Response of richness of aliens and natives to land use.** Values indicate decrease or increase in percentage of species richness using minimally-used primary vegetation as baseline (dashed line). Bars indicate 95% confidence intervals and are asymmetric because of back-transformation from the logarithmic scale of the models.

<https://doi.org/10.1371/journal.pone.0227169.g002>

14 in *S1 File*). None of the models could be simplified—land use interacted significantly with each island characteristic (Tables 13 and 15 in *S1 File*). However, only a few land uses had significant interaction coefficients (Figs 10 and 12 in *S1 File*), especially in the richness models, and hence few clear patterns could be discerned. The clearest pattern was seen in the effects of surrounding land mass on site-level species richness (Fig 3): sites within most land uses (but not croplands, pastures or plantation forests) have more alien species on isolated islands (i.e., those with the least surrounding landmass) than on less isolated ones. This trend was particularly strong in PriMin, primary vegetation and urban sites.

### Land use and compositional similarity of native vs alien assemblages

All interactions were significant in the abundance-based model ( $P = 0.005$  for all interaction terms, meaning that none of the 199 permutation trials produced any interaction as strong as those in the actual data). In the richness-based model, only environmental distance did not interact significantly with the alien/native term ( $P = 0.24$ ); the minimum adequate model retained all other interactions and environmental distance as a main effect ( $P = 0.005$  in all cases). For both  $J_A$  and  $J_R$ , the decline in similarity with geographic distance (i.e., distance-decay) is significantly steeper for alien assemblages than for native ones; for  $J_A$ , the reverse is true for the decline with environmental distance (Table 17 and Fig 14 in *S1 File*).

Once distance-decay effects are controlled for, land use affects compositional similarity to PriMin (i.e., the presence and abundance of novel species in land uses other than PriMin) significantly more in alien than native assemblages, for both  $J_R$  and  $J_A$  (Fig 4; Fig 15 in *S1 File*). Alien assemblages of PriMin sites were more compositionally similar to each other than to

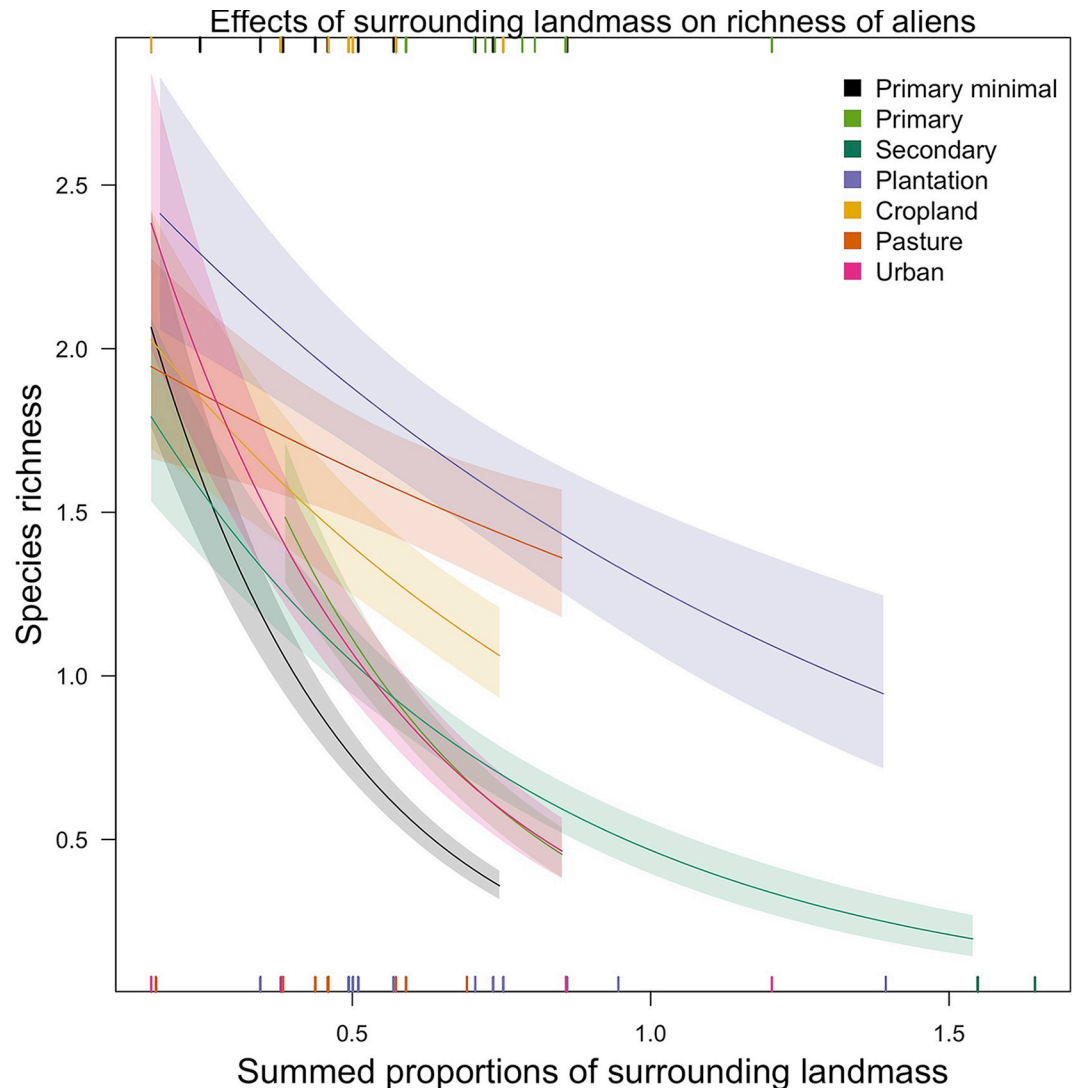

**Fig 3. Effects of surrounding landmass on richness of alien species across land uses.** For clarity, the error bars show half the standard error. The lines are curved because the response variable has been back-transformed from the logarithmic scale of the model. Slopes—i.e., estimates (est)—that are significantly different from zero: PriMin (est = -2.9, SE = 0.7, Chisq = 20.6,  $P < 0.001$ ), Primary vegetation (est = -2.5, SE = 0.8, Chisq = 7.0,  $P < 0.01$ ), Secondary vegetation (est = -1.6, SE = 0.4, Chisq = 6.9,  $P < 0.01$ ) and Urban (est = -2.4, SE = 0.5, Chisq = 10.3,  $P < 0.01$ ). Rugs along the horizontal margins show the values of surrounding landmass represented (across land uses) in the model data set (rugs for minimally-used primary vegetation, primary vegetation and croplands in the top margin and the rest of the land uses in the bottom margin). Rugs for land uses overlap, so some data are not visible.

<https://doi.org/10.1371/journal.pone.0227169.g003>

those in other land uses, especially agriculture. In contrast, native assemblages of PriMin sites were slightly less similar to each other than to assemblages of sites in most other land uses.

Moving to compositional similarity within each land use, pairs of sites within most land uses tend to have more similar assemblages than do pairs of PriMin sites, for both alien and native assemblages and for both  $J_R$  and  $J_A$  (Fig 5; Fig 16 in S1 File). Most of these within-land-use similarities differed significantly between alien and native assemblages; the reduction of spatial beta diversity (when compared to similarity between PriMin sites) is stronger for alien assemblages in plantation forests, but also, for  $J_R$ , in urban sites. Reduction of spatial beta diversity was stronger in native than alien assemblages in models for  $J_R$  in secondary

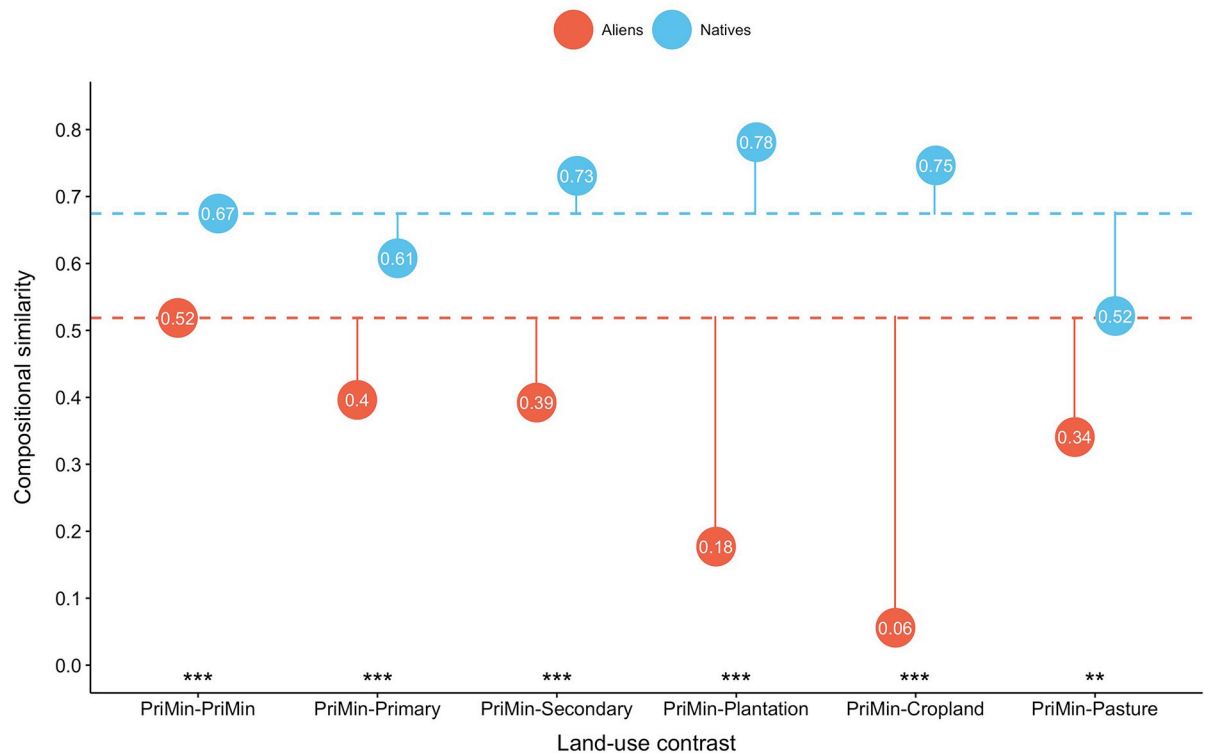

**Fig 4. Richness-based ( $J_R$ ) compositional similarity estimates for land-use contrasts where site  $i$  is in PriMin.** Solid lines show the magnitude of change in  $J_R$  driven by change to different land uses; the baseline is compositional similarity between PriMin sites for alien and native assemblages respectively (dashed lines). Significance (indicated by stars) is shown for alien/native differences for  $J_R$  changes from PriMin-PriMin on a logit scale (results from permutation tests and two-tailed tests comparing the coefficients for interaction between alien/native and land-use contrast to null distributions). Results for the PriMin-Urban contrast are not shown because sample sizes for this contrast were very small (for these coefficients, see Table 16 in S1 File) Significance codes: <math><0.05^{\*\*}</math>,

<https://doi.org/10.1371/journal.pone.0227169.g004>

vegetation and cropland but only slightly so (Fig 5), and in models for  $J_A$  in primary and secondary vegetation and pastures (Fig 16 in S1 File).

## Discussion

Human-dominated land uses markedly decrease the abundance and richness of native species in island sites and at the same time dramatically increase the abundance and richness of alien species. These findings are in line with previous suggestions that habitat modification tends to have particularly negative impacts on native [34,78] and narrow-range species [79], and with the hypothesis that alien species can be very successful in disturbed habitats [15,80–82]. Our results also corroborate studies that identified agriculture as a main cause of biodiversity loss [83,84]: cropland and pasture sites showed the largest reductions in native species-richness (with drastic reductions of -50% and -65% respectively) and, in pastures, abundance (-30% reduction).

On average, ~17% of the species and total abundance in minimally-disturbed sites corresponded to alien species. The presence of so many aliens even in sites with the least human impact violates the assumption that such sites accurately represent the assemblages of disturbed sites prior to land-use change—the central assumption of space-for-time substitution—with the result that statistical models such as ours are likely to underestimate the net effects of

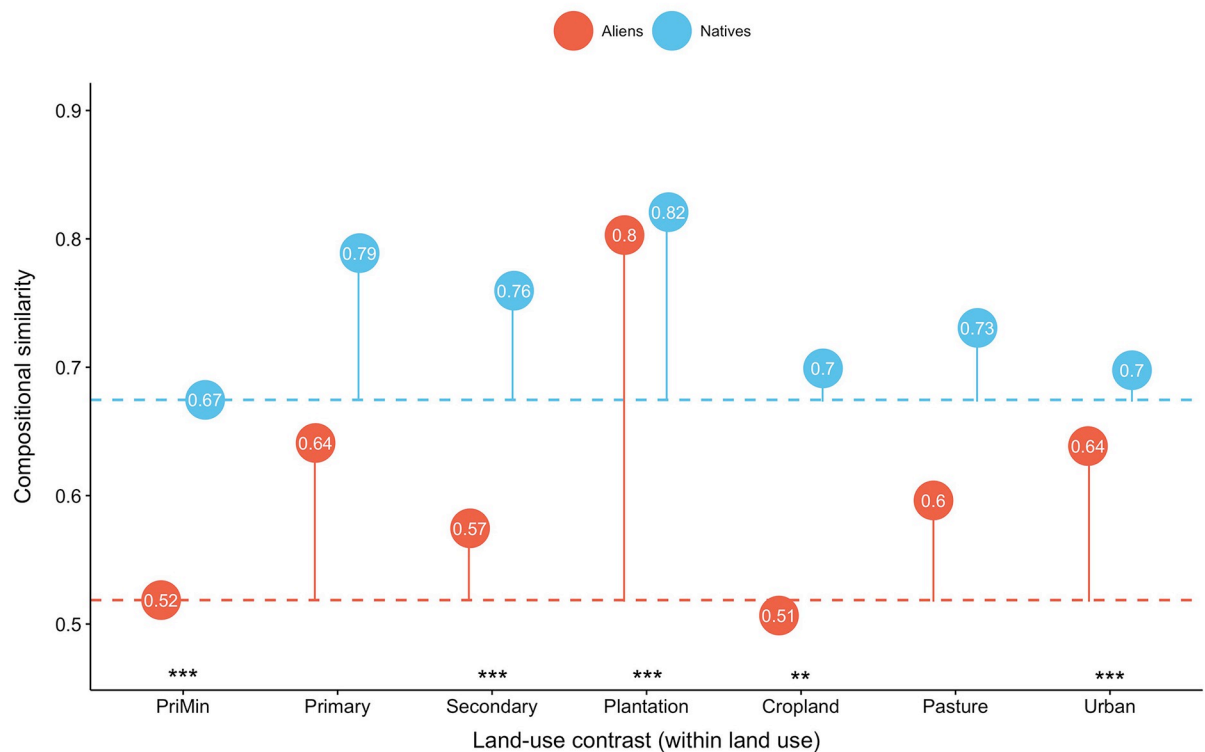

**Fig 5. Richness-based ( $J_R$ ) compositional similarity estimates for alien and native assemblages in sites within the same land use.** Each category corresponds to a land-use contrast (i.e., Cropland = Cropland-Cropland). Solid lines show the magnitude of change in  $J_R$  using PriMin-PriMin compositional similarity as baseline (dashed lines). Significance connotation and codes as in Fig 4.

<https://doi.org/10.1371/journal.pone.0227169.g005>

land-use change on local assemblages on islands [85]. Whether this problem extends to mainlands depends on the proportion of aliens in minimally-impacted mainland sites, which we are not able to estimate from our data. The proportion might be either higher (because of greater connectivity) or lower (because mainland assemblages are less likely be undersaturated).

Alien species are much more common on human-dominated sites than on more natural sites (especially minimally-used primary vegetation), as expected from their tolerance to disturbed conditions, their colonisation ability and the fact that they may need to displace native species in undisturbed sites [15]. The high abundance of aliens in agricultural sites and cities (Fig 1) has been highlighted previously [25,86–90], and often follows from intentional introduction (e.g., for livestock forage [91]; or, in cities, for trade [92] and ornamental gardening [93]). Overall, land-use change boosted alien abundance more than alien richness, suggesting that those alien species able to tolerate the extreme conditions of disturbed sites can become very successful and abundant [94,95] even if few species are introduced and become established—perhaps also partly because island natives are poor competitors in human-dominated land uses [15].

Sites on more isolated islands have higher absolute numbers of alien species across most land uses (Fig 3) and higher alien abundance in primary vegetation (Fig 10 in S1 File). These results support recent evidence that island remoteness promotes invasions by alien species worldwide [42], and provide further evidence that island biogeography of exotic species is not defined by the natural species–isolation relationship [40,41]. Redding et al. [31] recently found that the presence of other groups of introduced species at the introduction location is one of

the main determinants of successful establishment, suggesting an important role for location-specific factors. The reduced diversity of remote islands [39] may make them more invulnerable [41,96] (but see [97]) because of their high resource availability, missing functional groups and/or low pressures from competitors, pathogens or predators [16,98]. Isolated islands are expected to have particularly small species pools because of restricted immigration [39], leading to lower species richness per unit area and smaller samples from the set of potential species that can survive in different conditions [18]. Through its influence on the size of the species pool, isolation may tip the balance between natives and aliens in terms of which species colonise disturbed sites. We found that alien richness and abundance in minimally-disturbed primary vegetation decreases rapidly as surrounding landmass (and hence the source pool of natural colonists) increases, suggesting that saturated native assemblages are able to resist the influx of aliens better [99].

Factors related to the arrival or introduction of alien species are also likely to partly drive the high alien richness in human-dominated sites on isolated islands. In particular, propagule and/or colonisation pressure—positively related to the establishment of aliens [11,31]—might be higher in remote islands [40]: because such islands often have few native species that can be used for farming, hunting, as sources of fuel or for other economic purposes [16,40], there may be more intentional releases of alien species and high levels of imports [17].

Conversion of minimally-used primary vegetation to other land uses affects composition of alien assemblages more dramatically than native assemblages (Fig 4; Fig 15 in S1 File): the low number and abundance of alien species in natural habitats (Figs 7 and 8 in S1 File) means that other land uses are less likely to have alien species in common with minimally-disturbed sites. The native assemblages at disturbed sites on islands are likely to be nested subsets of undisturbed communities, given the small source pool of potential native colonists, their lack of adaptation to disturbed sites, and their poor competitiveness [16,18,100]. Pastures seem to be an important exception, including some native novel species (i.e., native species that are not present in minimally-disturbed vegetation). The pasture sites that are compared with minimally-used primary vegetation are mostly (147 out of 155 sites) not used intensively, and ~60% of these sites are from the South Island of New Zealand, Australia, Madagascar and Tierra del Fuego, where rangeland (i.e., ecosystems where the native vegetation has the potential to be grazed [101]) is common [102]. Resilient species among the natives may be able to establish in such rangelands and other low-intensity grazed sites.

Most land uses have lower spatial beta diversity than minimally-disturbed sites, for both alien and native assemblages (Fig 5; Fig 16 in S1 File). This biotic homogenization is stronger for alien assemblages only in plantations and, for richness-based estimates ( $J_R$ ), urban sites, in line with previous studies of these particular human-dominated land uses [103,104]. Our results therefore do not suggest that the gain of alien species in disturbed sites is the main cause of assemblage homogenization on islands—a contrast with previous studies mainly focusing on mainlands [104,105]. Instead, homogenization of island assemblages also seems to result from an important reduction of spatial beta diversity for native assemblages across most land uses. Addition of alien species drives homogenization if the same species become widespread across disturbed sites [36]. Our results suggest that such homogenization may not only be occurring in highly disturbed habitats such as pastures and urban sites, but also in forested land uses (i.e., particularly in plantations and primary vegetation with light or intense use): these are likely to harbour few alien species (since competition is higher than in more disturbed habitats) that are shared across sites. In contrast, alien assemblages in croplands are not more homogeneous than assemblages within minimally-disturbed sites, suggesting that the alien species in this land use are not ubiquitous across sites [36,106], perhaps due to different aliens establishing with different crops or different agricultural methods excluding different

species depending on their ecology. The homogenization pattern for native assemblages across land uses might be the result of a subtractive homogenization, caused by the loss or decline of different species from different sites [36] and the persistence of common species.

Because we were not able to classify all species as alien or native, our dataset includes a restricted number of islands. Expanding the dataset to more islands would increase the variation in island characteristics, thus increasing the power to detect any effects they have. However, it is also possible that the characteristics used in these models truly do not have an important effect on alien diversity: e.g., any effect of island area on the site-level richness and abundance of alien species might simply be outweighed by anthropogenic factors such as colonisation pressure. High economic activity is expected to increase the probability of arrival and establishment of alien species [10,11,107], which we did not find; but the country-level values of per-capita GDP may not be a good reflection of the economic activity of the islands.

Further limitations of our data include taxonomic and geographic biases, which may bias our inferences of the impacts of land use on island ecological assemblages. Among major taxonomic groups, our data had the highest number of studies for invertebrates, the lowest for plants, and no studies of fungi (Table 5 in [S1 File](#)). Studies in Asia, Europe and Oceania were equally common, but our data included fewer studies in Africa and the Americas.

Our models suggest that natives can be replaced by alien species, some of which might be invasive, in degraded habitats [81,108] and that, on islands, species turnover caused by land-use change might be driven mainly by novel alien species (unique to human-dominated land uses) rather than novel native species (e.g., from other ecosystems on the island), since these are unlikely to colonize anthropogenic habitats. Although this remains speculative, it is likely that mainland settings, having larger species pools than islands, could provide a larger number resilient natives able to establish and compete in disturbed sites [18]. Similar studies of mainlands would be able to assess whether the effects of land-use change on mainland assemblage composition may be driven by both alien and native synanthropic species missing from natural habitats but assembling into novel human-dominated ecosystems.

A question that remains is whether land-use change is the main driver of native species decline or if its effects interact with the presence of alien species [109]. We did not account for the effects of alien richness or abundance on native communities, but previous studies have highlighted habitat modification as the main driver of biodiversity decline, outcompeting other drivers such as invasive species or climate change [83,110]. However, on islands, alien species are important drivers of change and native extinctions [111,112]; therefore, more comprehensive analyses evaluating interactions between different human pressures are needed to disentangle the importance of different threats in driving losses of island biodiversity.

## Supporting information

**S1 File. Supporting figures and tables.**  
(DOCX)

## Acknowledgments

We thank Jason Tylianakis for his advice on compositional similarity models and Tim Newbold, Luca Börger and Jörn Scharlemann for their statistical advice. We are grateful to UNEP-WCMC for sharing data from the Global Island Database and to Samantha Hill for helping with its use. We also thank Dena Spatz for helping with the assemblage of data from the Threatened Island Biodiversity database, and Christian König for contributing to the revision of the manuscript. We are grateful to all data contributors to the PREDICTS database and all



contributors for the classification of species as aliens or natives. We thank all current and past members of the PREDICTS projects for their work in data collation and curation.

## Author Contributions

**Conceptualization:** Katia Sánchez-Ortiz, Andy Purvis.

**Data curation:** Katia Sánchez-Ortiz, Kara J. M. Taylor, Franz Essl, Wayne Dawson, Holger Kreft, Jan Pergl, Petr Pyšek, Mark van Kleunen, Patrick Weigelt.

**Formal analysis:** Katia Sánchez-Ortiz.

**Investigation:** Katia Sánchez-Ortiz, Andy Purvis.

**Methodology:** Katia Sánchez-Ortiz, Kara J. M. Taylor, Adriana De Palma, Andy Purvis.

**Project administration:** Andy Purvis.

**Supervision:** Andy Purvis.

**Validation:** Katia Sánchez-Ortiz, Andy Purvis.

**Visualization:** Katia Sánchez-Ortiz.

**Writing – original draft:** Katia Sánchez-Ortiz.

**Writing – review & editing:** Kara J. M. Taylor, Adriana De Palma, Franz Essl, Wayne Dawson, Holger Kreft, Jan Pergl, Petr Pyšek, Mark van Kleunen, Patrick Weigelt, Andy Purvis.

## References

1. Gibson L, Lee TM, Koh LP, Brook BW, Gardner TA, Barlow J, et al. Primary forests are irreplaceable for sustaining tropical biodiversity. *Nature*. 2011; 478(7369):378–81. <https://doi.org/10.1038/nature10425> PMID: 21918513
2. Murphy GEP, Romanuk TN. A meta-analysis of declines in local species richness from human disturbances. *Ecol Evol*. 2014; 4(1):91–103. <https://doi.org/10.1002/ece3.909> PMID: 24455164
3. Newbold T, Hudson LN, Hill SLL, Contu S, Lysenko I, Senior RA, et al. Global effects of land use on local terrestrial biodiversity. *Nature*. 2015; 520(7545):45–50. <https://doi.org/10.1038/nature14324> PMID: 25832402
4. Newbold T, Hudson LN, Hill SLL, Contu S, Gray CL, Scharlemann JPW, et al. Global patterns of terrestrial assemblage turnover within and among land uses. *Ecography (Cop)*. 2016; 39(12):1151–63.
5. De Palma A, Abrahamczyk S, Aizen MA, Albrecht M, Basset Y, Bates A, et al. Predicting bee community responses to land-use changes: Effects of geographic and taxonomic biases. *Sci Rep*. 2016; 6(1):31153. <https://doi.org/10.1038/srep31153> PMID: 27509831
6. Phillips HRP, Newbold T, Purvis A. Land-use effects on local biodiversity in tropical forests vary between continents. *Biodivers Conserv*. 2017; 26(9):2251–70. <https://doi.org/10.1007/s10531-017-1356-2> PMID: 32025108
7. Paulay G. Biodiversity on Oceanic Islands: Its Origin and Extinction 1. *Am Zool*. 1994; 34(1):134–44.
8. Simberloff D. Extinction-proneness of island species—Causes and management implications. *Raffles Bull Zool*. 2000; 48(1):1–9.
9. Sakai AK, Wagner WL, Mehrhoff LA. Patterns of Endangerment in the Hawaiian Flora. Funk V, editor. *Syst Biol*. 2002; 51(2):276–302. <https://doi.org/10.1080/10635150252899770> PMID: 12028733
10. Capinha C, Seebens H, Cassey P, García-Díaz P, Lenzner B, Mang T, et al. Diversity, biogeography and the global flows of alien amphibians and reptiles. Nori J, editor. *Divers Distrib*. 2017; 23(11):1313–22.
11. Dyer EE, Cassey P, Redding DW, Collen B, Franks V, Gaston KJ, et al. The Global Distribution and Drivers of Alien Bird Species Richness. Ricklefs R, editor. *PLOS Biol*. 2017; 15(1):e2000942. <https://doi.org/10.1371/journal.pbio.2000942> PMID: 28081142
12. Pyšek P, Pergl J, Essl F, Lenzner B, Dawson W, Kreft H, et al. Naturalized alien flora of the world. *Preslia*. 2017; 89(3):203–74.

13. Dawson W, Moser D, van Kleunen M, Kreft H, Pergl J, Pyšek P, et al. Global hotspots and correlates of alien species richness across taxonomic groups. *Nat Ecol Evol*. 2017; 1(7):0186.
14. Simberloff D. Why Do Introduced Species Appear to Devastate Islands More Than Mainland Areas? *Pacific Sci*. 1995; 49(1):87–97.
15. Sax DF, Brown JH. The paradox of invasion. *Glob Ecol Biogeogr*. 2000; 9(5):363–71.
16. Denslow JS. Weeds in Paradise: Thoughts on the Invasibility of Tropical Islands. *Ann Missouri Bot Gard*. 2003; 90(1):119–27.
17. Dalmazzone S, Giaccaria S. Economic drivers of biological invasions: A worldwide, bio-geographic analysis. *Ecol Econ*. 2014; 105:154–65.
18. Herben T. Species pool size and invasibility of island communities: A null model of sampling effects. *Ecol Lett*. 2005; 8(9):909–17.
19. Whittaker RJ, Fernández-Palacios JM, Matthews TJ, Borregaard MK, Triantis KA. Island biogeography: Taking the long view of nature's laboratories. *Science* (80-). 2017; 357(6354):eaam8326.
20. Gillespie RG, Claridge EM, Roderick GK. Biodiversity dynamics in isolated island communities: interaction between natural and human-mediated processes. *Mol Ecol*. 2008; 17(1):45–57. <https://doi.org/10.1111/j.1365-294X.2007.03466.x> PMID: 17727622
21. Adler GH, Levins R. The island syndrome in rodent populations. *Q Rev Biol*. 1994; 69(4):473–90. <https://doi.org/10.1086/418744> PMID: 7855232
22. Siliceo I, Díaz JA. A comparative study of clutch size, range size, and the conservation status of island vs. mainland lacertid lizards. *Biol Conserv*. 2010; 143(11):2601–8.
23. Meiri S, Brown JH, Sibly RM. The ecology of lizard reproductive output. *Glob Ecol Biogeogr*. 2012; 21(5):592–602.
24. Borges PAV, Lobo JM, Azevedo EB, Gaspar CS, Melo C, Nunes LV. Invasibility and species richness of island endemic arthropods: a general model of endemic vs. exotic species. *J Biogeogr*. 2006; 33(1):169–87.
25. Meijer SS, Whittaker RJ, Borges PAV. The effects of land-use change on arthropod richness and abundance on Santa Maria Island (Azores): unmanaged plantations favour endemic beetles. *J Insect Conserv*. 2011; 15(4):505–22.
26. Marini L, Battisti A, Bona E, Federici G, Martini F, Pautasso M, et al. Alien and native plant life-forms respond differently to human and climate pressures. *Glob Ecol Biogeogr*. 2012; 21(5):534–44.
27. Sakai AK, Allendorf FW, Holt JS, Lodge DM, Molofsky J, With KA, et al. The Population Biology of Invasive Species. *Annu Rev Ecol Syst*. 2001; 32(1):305–32.
28. Hamilton MA, Murray BR, Cadotte MW, Hose GC, Baker AC, Harris CJ, et al. Life-history correlates of plant invasiveness at regional and continental scales. *Ecol Lett*. 2005; 8(10):1066–74.
29. Cadotte MW, Murray BR, Lovett-Doust J. Ecological patterns and biological invasions: Using regional species inventories in macroecology. *Biol Invasions*. 2006; 8(4):809–21.
30. Lockwood JL, Cassey P, Blackburn T. The role of propagule pressure in explaining species invasions. *Trends Ecol Evol*. 2005; 20(5):223–8. <https://doi.org/10.1016/j.tree.2005.02.004> PMID: 16701373
31. Redding DW, Pigot AL, Dyer EE, Şekercioğlu ÇH, Kark S, Blackburn TM. Location-level processes drive the establishment of alien bird populations worldwide. *Nature*. 2019; 571(7763):103–6. <https://doi.org/10.1038/s41586-019-1292-2> PMID: 31217580
32. Cardillo M, Mace GM, Jones KE, Bielby J, Bininda-Emonds ORP, Sechrest W, et al. Multiple causes of high extinction risk in large mammal species. *Science* (80-). 2005; 309(5738):1239–41. <https://doi.org/10.1126/science.1116030> PMID: 16037416
33. Ripple WJ, Wolf C, Newsome TM, Hoffmann M, Wirsing AJ, McCauley DJ. Extinction risk is most acute for the world's largest and smallest vertebrates. *Proc Natl Acad Sci*. 2017; 114(40):10678–83. <https://doi.org/10.1073/pnas.1702078114> PMID: 28923917
34. McKinney ML, Lockwood JL. Biotic homogenization: a few winners replacing many losers in the next mass extinction. *Trends Ecol Evol*. 1999; 14(11):450–3. [https://doi.org/10.1016/s0169-5347\(99\)01679-1](https://doi.org/10.1016/s0169-5347(99)01679-1) PMID: 10511724
35. Collen B, Dulvy NK, Gaston KJ, Gärdenfors U, Keith DA, Punt AE, et al. Clarifying misconceptions of extinction risk assessment with the IUCN Red List. *Biol Lett*. 2016; 12(4):20150843. <https://doi.org/10.1098/rsbl.2015.0843> PMID: 27072401
36. Socolar JB, Gilroy JJ, Kunin WE, Edwards DP. How Should Beta-Diversity Inform Biodiversity Conservation? *Trends Ecol Evol*. 2016; 31(1):67–80. <https://doi.org/10.1016/j.tree.2015.11.005> PMID: 26701706

37. Arévalo JR, Delgado JD, Otto R, Naranjo A, Salas M, Fernández-Palacios JM. Distribution of alien vs. native plant species in roadside communities along an altitudinal gradient in Tenerife and Gran Canaria (Canary Islands). *Perspect Plant Ecol Evol Syst*. 2005; 7(3):185–202.
38. Acevedo MA, Restrepo C. Land-cover and land-use change and its contribution to the large-scale organization of Puerto Rico's bird assemblages. *Divers Distrib*. 2008; 14(1):114–22.
39. MacArthur RH, Wilson EO. *The theory of island biogeography*. Princeton: Princeton University Press; 1967.
40. Blackburn TM, Cassey P, Lockwood JL. The island biogeography of exotic bird species. *Glob Ecol Biogeogr*. 2008; 17(2):246–51.
41. Helmus MR, Mahler DL, Losos JB. Island biogeography of the Anthropocene. *Nature*. 2014; 513(7519):543–6. <https://doi.org/10.1038/nature13739> PMID: 25254475
42. Moser D, Lenzner B, Weigelt P, Dawson W, Kreft H, Pergl J, et al. Remoteness promotes biological invasions on islands worldwide. *Proc Natl Acad Sci*. 2018; 115(37):9270–5. <https://doi.org/10.1073/pnas.1804179115> PMID: 30158167
43. Lockwood JL, Cassey P, Blackburn TM. The more you introduce the more you get: the role of colonization pressure and propagule pressure in invasion ecology. *Divers Distrib*. 2009; 15(5):904–10.
44. Dyer EE, Cassey P, Redding DW, Collen B, Franks V, Gaston KJ, et al. The Global Distribution and Drivers of Alien Bird Species Richness. Ricklefs R, editor. *PLOS Biol*. 2017; 15(1):e2000942. <https://doi.org/10.1371/journal.pbio.2000942> PMID: 28081142
45. Westphal MI, Browne M, MacKinnon K, Noble I. The link between international trade and the global distribution of invasive alien species. *Biol Invasions*. 2008; 10(4):391–8.
46. Hulme PE. Trade, transport and trouble: managing invasive species pathways in an era of globalization. *J Appl Ecol*. 2009; 46(1):10–8.
47. Essl F, Dawson W, Kreft H, Pergl J, Pyšek P, van Kleunen M, et al. Drivers of the relative richness of naturalized and invasive plant species on Earth. *AoB Plants*. 2019; 11(5):1–13. <https://doi.org/10.1093/aobpla/plz051> PMID: 31636882
48. Hudson LN, Newbold T, Contu S, Hill SLL, Lysenko I, De Palma A, et al. The database of the PREDICTS (Projecting Responses of Ecological Diversity In Changing Terrestrial Systems) project. *Ecol Evol*. 2017; 7(1):145–88. <https://doi.org/10.1002/ece3.2579> PMID: 28070282
49. Hudson LN, Newbold T, Contu S, Hill SLL, Lysenko I, De Palma A, et al. The PREDICTS database: a global database of how local terrestrial biodiversity responds to human impacts. *Ecol Evol*. 2014; 4(24):4701–35. <https://doi.org/10.1002/ece3.1303> PMID: 25558364
50. Wilford GE, Brown PJ. Maps of late Mesozoic-Cenozoic Gondwana break-up: some palaeogeographical implications. In: Hill RS, editor. *History of the Australian Vegetation: Cretaceous to Recent*. Adelaide: University of Adelaide Press; 1994. p. 5–13.
51. UNEP-WCMC. Global distribution of islands; 2015. Database: Global Island Database (version 2.1).
52. R Core Team. *R: A language and environment for statistical computing*. Vienna: R Foundation for Statistical Computing; 2017.
53. van Kleunen M, Dawson W, Essl F, Pergl J, Winter M, Weber E, et al. Global exchange and accumulation of non-native plants. *Nature*. 2015; 525(7567):100–3. <https://doi.org/10.1038/nature14910> PMID: 26287466
54. van Kleunen M, Pyšek P, Dawson W, Essl F, Kreft H, Pergl J, et al. The Global Naturalized Alien Flora (GloNAF) database. *Ecology*. 2019; 100(1):e02542. <https://doi.org/10.1002/ecy.2542> PMID: 30341991
55. Weigelt P, König C, Kreft H. GIFT—A Global Inventory of Floras and Traits for macroecology and biogeography. *J Biogeogr*. 2020; 47:16–43.
56. Partners TIB. *The Threatened Island Biodiversity Database*. 2017.
57. Bates D, Maechler M, Bolker B, Walker S. 'lme4' package ver. 1.1–15. 2017.
58. CIESIN IFPRI, The World Bank CIAT. Global Rural-Urban Mapping Project, Version 1 (GRUMPv1): Population Density Grid. 2011. <https://doi.org/10.1126/science.1208821> PMID: 22034418
59. CIESIN, ITOS. Global Roads Open Access Data Set, Version 1 (gROADSv1). 2013.
60. Zuur AF, Ieno EN, Walker NJ, Saveliev AA, Smith GM. *Mixed Effects Models and Extensions in Ecology with R*. New York: Springer Science & Business Media; 2009.
61. Harrison XA. Using observation-level random effects to model overdispersion in count data in ecology and evolution. *PeerJ*. 2014; 2:e616. <https://doi.org/10.7717/peerj.616> PMID: 25320683
62. OpenStreetMap Contributors. *Land polygons*. 2015.

63. Weigelt P, Jetz W, Kreft H. Bioclimatic and physical characterization of the world's islands. *Proc Natl Acad Sci*. 2013; 110(38):15307–12. <https://doi.org/10.1073/pnas.1306309110> PMID: 24003123
64. Weigelt P, Kreft H. Quantifying island isolation—insights from global patterns of insular plant species richness. *Ecography (Cop)*. 2013; 36(4):417–29.
65. Zuur AF, Ieno EN, Smith GM. *Analyzing Ecological Data*. New York: Springer Science & Business Media; 2007.
66. De Rosario-Martinez H. 'phia' package ver. 0.2–1. 2015.
67. Lichstein JW. Multiple regression on distance matrices: A multivariate spatial analysis tool. *Plant Ecol*. 2007; 188(2):117–31.
68. Newbold T, Hudson LN, Arnell AP, Contu S, De Palma A, Ferrier S, et al. Has land use pushed terrestrial biodiversity beyond the planetary boundary? A global assessment. *Science (80-)*. 2016; 353(6296):288–91. <https://doi.org/10.1126/science.aaf2201> PMID: 27418509
69. Baselga A. Partitioning the turnover and nestedness components of beta diversity. *Glob Ecol Biogeogr*. 2010; 19(1):134–43.
70. Nekola JC, White PS. The distance decay of similarity in biogeography and ecology. *J Biogeogr*. 1999; 26(4):867–78.
71. Bolker BM, Brooks ME, Clark CJ, Geange SW, Poulsen JR, Stevens MHH, et al. Generalized linear mixed models: a practical guide for ecology and evolution. *Trends Ecol Evol*. 2009; 24(3):127–35. <https://doi.org/10.1016/j.tree.2008.10.008> PMID: 19185386
72. Hijmans RJ, Williams E, Vennes C. 'geosphere' package ver. 1.5–7. 2017.
73. van der Loo M. 'gower' package ver. 0.1.2. 2017.
74. Hijmans RJ, Cameron SE, Parra JL, Jones PG, Jarvis A. Very high resolution interpolated climate surfaces for global land areas. *Int J Climatol*. 2005; 25(15):1965–78.
75. Warton DI, Hui FKC. The arcsine is asinine: the analysis of proportions in ecology. *Ecology*. 2011; 92(1):3–10. <https://doi.org/10.1890/10-0340.1> PMID: 21560670
76. Phillips HRP, Halley JM, Urbina-Cardona JN, Purvis A. The effect of fragment area on site-level biodiversity. *Ecography (Cop)*. 2018; 41(7):1220–31.
77. Dray S, Dufour AB, Thioulouse J. 'ade4' package ver. 1.7–10. 2007.
78. Scholes RJ, Biggs R. A biodiversity intactness index. *Nature*. 2005; 434(7029):45–9. <https://doi.org/10.1038/nature03289> PMID: 15744293
79. Newbold T, Hudson LN, Contu S, Hill SLL, Beck J, Liu Y, et al. Widespread winners and narrow-ranged losers: Land use homogenizes biodiversity in local assemblages worldwide. Morlon H, editor. *PLOS Biol*. 2018; 16(12):e2006841. <https://doi.org/10.1371/journal.pbio.2006841> PMID: 30513079
80. Pyšek P, Bacher S, Chytrý M, Jarošík V, Wild J, Celesti-Grappo L, et al. Contrasting patterns in the invasions of European terrestrial and freshwater habitats by alien plants, insects and vertebrates. *Glob Ecol Biogeogr*. 2010; 19(3):317–31.
81. Catford JA, Daehler CC, Murphy HT, Sheppard AW, Hardesty BD, Westcott DA, et al. The intermediate disturbance hypothesis and plant invasions: Implications for species richness and management. *Perspect Plant Ecol Evol Syst*. 2012; 14(3):231–41.
82. Lembrechts JJ, Pauchard A, Lenoir J, Nuñez MA, Geron C, Ven A, et al. Disturbance is the key to plant invasions in cold environments. *Proc Natl Acad Sci*. 2016; 113(49):14061–6. <https://doi.org/10.1073/pnas.1608980113> PMID: 27872292
83. Maxwell SL, Fuller RA, Brooks TM, Watson JEM. Biodiversity: The ravages of guns, nets and bulldozers. *Nature*. 2016; 536(7615):143–5. <https://doi.org/10.1038/536143a> PMID: 27510207
84. Brummitt NA, Bachman SP, Griffiths-Lee J, Lutz M, Moat JF, Farjon A, et al. Green Plants in the Red: A Baseline Global Assessment for the IUCN Sampled Red List Index for Plants. Jenkins CN, editor. *PLoS One*. 2015; 10(8):e0135152. <https://doi.org/10.1371/journal.pone.0135152> PMID: 26252495
85. Purvis A, Newbold T, De Palma A, Contu S, Hill SLL, Sanchez-Ortiz K, et al. Modelling and Projecting the Response of Local Terrestrial Biodiversity Worldwide to Land Use and Related Pressures: The PREDICTS Project. In: *Advances in Ecological Research*. 2018.
86. Pouteau R, Hulme PE, Duncan RP. Widespread native and alien plant species occupy different habitats. *Ecography (Cop)*. 2015; 38(5):462–71.
87. Pyšek P. Alien and native species in Central European urban floras: a quantitative comparison. *J Biogeogr*. 1998; 25(1):155–63.
88. McIntyre NE. Ecology of Urban Arthropods: a Review and a Call to Action. *Ann Entomol Soc Am*. 2000; 93(4):825–35.

89. McKinney ML. Urbanization, Biodiversity, and Conservation: The impacts of urbanization on native species are poorly studied, but educating a highly urbanized human population about these impacts can greatly improve species conservation in all ecosystems. *Bioscience*. 2002; 52(10):883–90.
90. Rembold K, Mangopo H, Tjitrosoedirdjo SS, Kreft H. Plant diversity, forest dependency, and alien plant invasions in tropical agricultural landscapes. *Biol Conserv*. 2017; 213:234–42.
91. Monroe AP, Hill JG, Martin JA. Spread of exotic grass in grazed native grass pastures and responses of insect communities. *Restor Ecol*. 2017; 25(4):539–48.
92. Kowarik I. Novel urban ecosystems, biodiversity, and conservation. *Environ Pollut*. 2011; 159(8–9):1974–83. <https://doi.org/10.1016/j.envpol.2011.02.022> PMID: 21435761
93. van Kleunen M, Essl F, Pergl J, Brundu G, Carboni M, Dullinger S, et al. The changing role of ornamental horticulture in alien plant invasions. *Biol Rev*. 2018; 93(3):1421–37. <https://doi.org/10.1111/brv.12402> PMID: 29504240
94. McKinney ML. Urbanization as a major cause of biotic homogenization. *Biol Conserv*. 2006; 127(3):247–60.
95. Pyšek P, Richardson DM. Traits Associated with Invasiveness in Alien Plants: Where Do we Stand? In: *Biological Invasions*. Berlin, Heidelberg: Springer Berlin Heidelberg; 2007. p. 97–125.
96. Roderick GK, Vernon P. Biological invasions. In: Gillespie RG, Clague DA, editors. *Encyclopedia of Islands*. Berkeley: University of California Press; 2009. p. 475–80.
97. Lonsdale WM. Global Patterns of Plant Invasions and the Concept of Invasibility. *Ecology*. 1999; 80(5):1522–36.
98. Gillespie RG, Baldwin BG. Island biogeography of remote archipelagoes. In: Losos JB, Ricklefs RE, editors. *The theory of island biogeography revisited*. Princeton: Princeton University Press; 2010. p. 358–87.
99. Kennedy TA, Naeem S, Howe KM, Knops JMH, Tilman D, Reich P. Biodiversity as a barrier to ecological invasion. *Nature*. 2002; 417(6889):636–8. <https://doi.org/10.1038/nature00776> PMID: 12050662
100. Whittaker RJ, Fernandez-Palacios JM. *Island biogeography. Ecology, evolution and conservation*. New York: Oxford University Press; 2007.
101. Allen VG, Batello C, Berretta EJ, Hodgson J, Kothmann M, Li X, et al. An international terminology for grazing lands and grazing animals. *Grass Forage Sci*. 2011; 66(1):2–28.
102. Ellis EC, Ramankutty N. Putting people in the map: anthropogenic biomes of the world. *Front Ecol Environ*. 2008; 6(8):439–47.
103. Manor R, Cohen O, Saltz D. Community homogenization and the invasiveness of commensal species in Mediterranean afforested landscapes. *Biol Invasions*. 2008; 10(4):507–15.
104. La Sorte FA, Aronson MFJ, Williams NSG, Celesti-Grapow L, Cilliers S, Clarkson BD, et al. Beta diversity of urban floras among European and non-European cities. *Glob Ecol Biogeogr*. 2014; 23(7):769–79.
105. McKinney ML. Measuring floristic homogenization by non-native plants in North America. *Glob Ecol Biogeogr*. 2004; 13(1):47–53.
106. Florencio M, Lobo JM, Cardoso P, Almeida-Neto M, Borges PAV. The Colonisation of Exotic Species Does Not Have to Trigger Faunal Homogenisation: Lessons from the Assembly Patterns of Arthropods on Oceanic Islands. Chapman M (Gee) G, editor. *PLoS One*. 2015; 10(5):e0128276. <https://doi.org/10.1371/journal.pone.0128276> PMID: 26024235
107. Dalmazzone S. Economic factors affecting vulnerability to biological invasions. In: Perrings C, Dalmazzone S, Williamson MH, editors. *The Economics of Biological Invasions*. Cheltenham: Edward Elgar Publishing; 2000. p. 17–30.
108. Irwin MT, Wright PC, Birkinshaw C, Fisher BL, Gardner CJ, Glos J, et al. Patterns of species change in anthropogenically disturbed forests of Madagascar. *Biol Conserv*. 2010; 143(10):2351–62.
109. Didham RK, Tylianakis JM, Gemmill NJ, Rand TA, Ewers RM. Interactive effects of habitat modification and species invasion on native species decline. *Trends Ecol Evol*. 2007; 22(9):489–96. <https://doi.org/10.1016/j.tree.2007.07.001> PMID: 17673330
110. Díaz S, Settele J, Brondízio ES, Ngo HT, Agard J, Arneth A, et al. Pervasive human-driven decline of life on Earth points to the need for profound change. *Science* (80-). 2019; 366(6471).
111. Gurevitch J, Padilla D. Are invasive species a major cause of extinctions? *Trends Ecol Evol*. 2004; 19(9):470–4. <https://doi.org/10.1016/j.tree.2004.07.005> PMID: 16701309
112. McCreless EE, Huff DD, Croll DA, Tershy BR, Spatz DR, Holmes ND, et al. Past and estimated future impact of invasive alien mammals on insular threatened vertebrate populations. *Nat Commun*. 2016; 7(1):12488. <https://doi.org/10.1038/ncomms12488> PMID: 27535095
